# Supplementary material
Source: PubMed Central journal article supplement (PMC3443310)

## Supplementary data Figure 4.

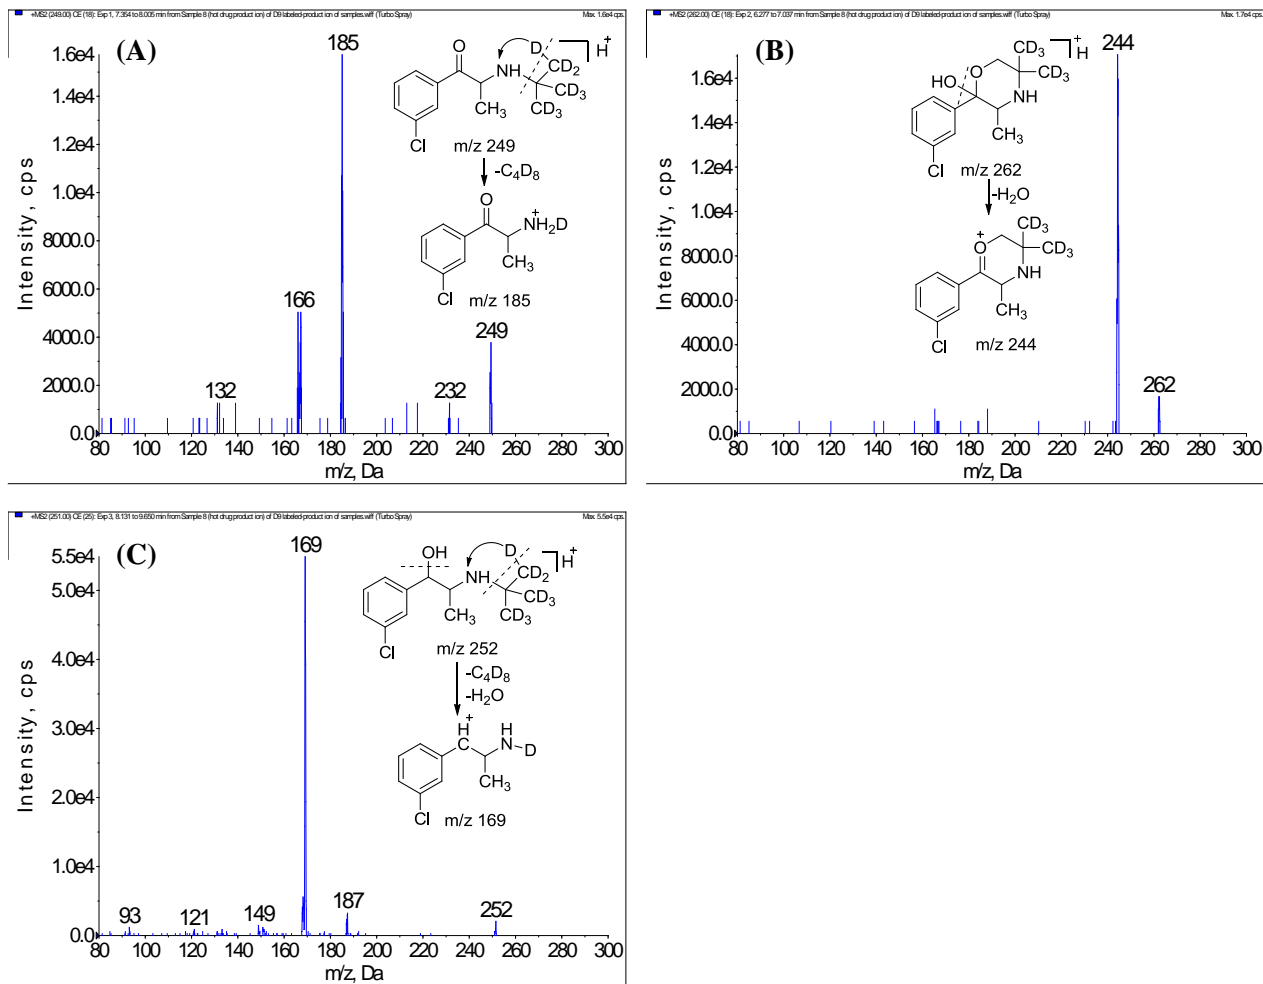

Supplement: NIHMS379930-supplement-01.pdf [file NIHMS379930-supplement-01.pdf]
